# Supplementary material
Source: publisher figshare collection journal article supplement (https://acs.figshare.com/ndownloader/files/6871686)
Supplement: Supplementary file 1 [file 6871686]

## Sheet: Legend
Supplemental Table S-1	Sheet
Supplemental Table S-1 Legend	1: Legend
Uniprot accession number and Gene Name of the mDia2 WT-binding protein ranked according to the Log2 H/L ratio obtained from label-swap experiments. Only the proteins having a ratio higher than 1 and lower than -1 in both directions are included in the list.	2: SILAC WT
Uniprot accession number and Gene Name of the mDia2 MA-binding protein ranked according to the Log2 H/L ratio obtained from label-swap experiments. Only the proteins having a ratio higher than 1 and lower than -1 in both directions are included in the list.	3: SILAC MA

## Sheet: SILAC WT
Supplemental Table S-1
	mDia2 WT interactome
	Accession(s)	Gene(s)	Description(s)	No. peptides [WT/Ctrl]	Seq. coverage [WT/Ctrl] [%]	(H/L = WT/Ctrl)	Quantitation count [WT/Ctrl]	Quantitation variability [%] [WT/Ctrl]	No. peptides [Ctrl/WT]	Seq. coverage [Ctrl/WT] [%]	(H/L = Ctrl/WT)	Quantitation count [Ctrl/WT]	Quantitation variability [%] [Ctrl/WT]
	Q9NP79	VTA1	Vacuolar protein sorting-associated protein VTA1 homolog	9	25.7	5.89042	8	48.562	6	24.1	-7.06304	10	172.92
	Q9UK99	FBXO3	F-box only protein 3	4	8.5	4.4914	4	10.008	5	17.8	-3.56318	6	104.93
	P35080	PFN2	Profilin-2	4	27.1	4.23848	4	21.468	6	37.9	-4.26321	5	31.351
	Q9NSV4	DIAPH3	Protein diaphanous homolog 3	23	16.9	4.14722	124	149.71	26	20	-4.82722	71	115.21
	P17066;P48741	HSPA6;HSPA7	Heat shock 70 kDa protein 6;Putative heat shock 70 kDa protein 7	10	16.3	3.89772	5	25.722	12	17	-5.70132	6	101.27
	P13674	P4HA1	Prolyl 4-hydroxylase subunit alpha-1	2	4.9	3.89278	2	149.57	10	24.7	-4.90556	10	95.858
	P07737	PFN1	Profilin-1	10	72.1	3.83905	9	19.479	10	67.1	-4.10326	10	8.0206
	Q15370	TCEB2	Transcription elongation factor B polypeptide 2	3	28.8	3.8336	3	36.316	3	39.8	-3.44451	3	91.985
	P07237	P4HB	Protein disulfide-isomerase	5	11.6	3.57749	5	33.827	6	15.9	-4.09692	3	29.9
	P30153	PPP2R1A	Serine/threonine-protein phosphatase 2A 65 kDa regulatory subunit A alpha isoform	7	12.1	3.51639	8	12.294	11	24.1	-3.97808	12	22.042
	Q9NZZ3	CHMP5	Charged multivesicular body protein 5	3	18.3	3.31503	4	138.27	3	18.3	-6.97168	2	13.294
	Q15369	TCEB1	Transcription elongation factor B polypeptide 1	2	25.9	3.18441	2	5.3645	4	38.4	-3.81319	3	7.6157
	Q96Q89	KIF20B	Kinesin-like protein KIF20B	2	1.5	3.07068	2	105.17	4	3.4	-2.80208	2	80.503
	P27708	CAD	CAD protein;Glutamine-dependent carbamoyl-phosphate synthase;Aspartate carbamoyltransferase;Dihydroorotase	22	12.9	2.9325	30	95.653	42	25.9	-2.79927	38	12.916
	Q93008	USP9X	Probable ubiquitin carboxyl-terminal hydrolase FAF-X	7	3.4	2.87935	6	95.706	7	4	-3.96344	8	26.306
	P22732	SLC2A5	Solute carrier family 2, facilitated glucose transporter member 5	1	1.6	2.72218	14	168.34	1	1.6	-4.37626	3	147.97
	P78527	PRKDC	DNA-dependent protein kinase catalytic subunit	10	2.9	2.67954	9	114.19	25	7.3	-2.91517	23	44.682
	Q12830	BPTF	Nucleosome-remodeling factor subunit BPTF	1	0.2	2.61589	6	151.09	1	0.2	-9.05444	6	246.61
	O95831	AIFM1	Apoptosis-inducing factor 1, mitochondrial	4	7	2.02304	4	18.132	4	9.1	-2.55572	4	34.823
	Q9Y265	RUVBL1	RuvB-like 1	3	7.9	1.98958	3	21.666	3	8.8	-1.80218	3	63.168
	O43242	PSMD3	26S proteasome non-ATPase regulatory subunit 3	6	16.9	1.84089	6	45.394	18	41.6	-2.12809	19	29.898
	P63261;P60709	ACTG1;ACTB	Actin, cytoplasmic 2;Actin, cytoplasmic 2, N-terminally processed;Actin, cytoplasmic 1;Actin, cytoplasmic 1, N-terminally processed	18	54.1	1.68769	29	30.763	24	62.4	-2.10687	40	15.433
	Q9HB71	CACYBP	Calcyclin-binding protein	2	8.8	1.58092	2	19.363	4	28.1	-1.81213	3	40.571
	P06493	CDK1	Cyclin-dependent kinase 1	6	25.6	1.55572	6	17.143	8	35	-1.88571	6	32.81
	P68133;P68032;P62736;P63267	ACTA1;ACTC1;ACTA2;ACTG2	Actin, alpha skeletal muscle;Actin, alpha cardiac muscle 1;Actin, aortic smooth muscle;Actin, gamma-enteric smooth muscle	12	31.8	1.4916	3	6.4764	19	43	-2.15367	3	48.783
	P31689	DNAJA1	DnaJ homolog subfamily A member 1	3	9.6	1.2844	3	7.1935	2	6.3	-1.45091	3	10.919
	P62195	PSMC5	26S protease regulatory subunit 8	3	9.9	1.24343	3	22.022	7	24.6	-1.38458	7	10.769
	Q9Y5A9	YTHDF2	YTH domain family protein 2	2	4.3	1.20733	2	9.3064	2	5.2	-1.29708	2	28.912
	P62333	PSMC6	26S protease regulatory subunit 10B	3	9	1.20289	3	23.94	6	18	-1.32398	5	4.1276
	P43686	PSMC4	26S protease regulatory subunit 6B	3	8.6	1.1762	3	24.858	4	12.9	-1.49326	4	15.071
	P31948	STIP1	Stress-induced-phosphoprotein 1	3	7.9	1.16144	3	16.462	5	10.7	-2.02503	5	18.707
	P25786	PSMA1	Proteasome subunit alpha type-1	3	14.4	1.0827	3	4.9297	4	18.6	-1.37265	4	21.594
	Q9UNM6	PSMD13	26S proteasome non-ATPase regulatory subunit 13	3	8.2	1.04376	3	14.748	4	11.4	-1.32532	4	10.433

## Sheet: SILAC MA
Supplemental Table S-1
	mDia2 MA interactome
	Accession(s)	Gene(s)	Description(s)	No. peptides [MA/Ctrl]	Seq. coverage [MA/Ctrl] [%]	(H/L = MA/Ctrl)	Quantitation count [MA/Ctrl]	Quantitation variability [%] [MA/Ctrl]	No. peptides [Ctrl/MA]	Seq. coverage [Ctrl/MA] [%]	(H/L = Ctrl/MA)	Quantitation count [Ctrl/MA]	Quantitation variability [%] [Ctrl/MA]
	Q9NP79	VTA1	Vacuolar protein sorting-associated protein VTA1 homolog	6	26.7	6.46576	8	94.738	4	16	-4.50321	6	141.53
	P22732	SLC2A5	Solute carrier family 2, facilitated glucose transporter member 5	1	1.6	5.05081	13	164.46	1	1.6	-3.27523	3	261.28
	Q12830	BPTF	Nucleosome-remodeling factor subunit BPTF	1	0.2	4.9787	7	136.18	1	0.2	-4.63551	5	208.61
	Q9NSV4	DIAPH3	Protein diaphanous homolog 3	25	19.9	4.68392	128	133.34	24	17.8	-4.68264	92	129.01
	P08107	HSPA1A	Heat shock 70 kDa protein 1A/1B	28	43.5	4.53841	41	158.6	34	45.2	-5.34391	48	27.848
	P17066;P48741	HSPA6;HSPA7	Heat shock 70 kDa protein 6;Putative heat shock 70 kDa protein 7	12	17	4.39396	5	89.164	12	17	-4.4597	3	37.831
	P11142	HSPA8	Heat shock cognate 71 kDa protein	31	46.1	4.37142	54	147.11	31	51.5	-5.25006	52	50.014
	P22061	PCMT1	Protein-L-isoaspartate(D-aspartate) O-methyltransferase	8	39.6	4.26386	5	34.973	3	22.5	-1.99643	4	40.556
	Q13162	PRDX4	Peroxiredoxin-4	4	13.7	4.20836	2	1.451	4	13.7	-4.49847	2	26.893
	P34932	HSPA4	Heat shock 70 kDa protein 4	10	16.2	3.86948	5	27.429	3	5.4	-3.80005	2	22.275
	P38646	HSPA9	Stress-70 protein, mitochondrial	16	29.9	3.68055	16	163.23	17	32.8	-4.45428	12	20.021
	P13674	P4HA1	Prolyl 4-hydroxylase subunit alpha-1	2	5.4	3.40626	2	68.737	4	10.7	-3.34832	4	32.178
	Q93008	USP9X	Probable ubiquitin carboxyl-terminal hydrolase FAF-X	7	3.8	3.32279	5	5.5043	12	6.7	-3.21665	3	45.228
	Q06830	PRDX1	Peroxiredoxin-1	2	6	3.2198	2	61.643	3	10.1	-2.93346	3	72.004
	P78527	PRKDC	DNA-dependent protein kinase catalytic subunit	26	8	3.05613	24	24.925	23	6.9	-3.20144	13	29.087
	P27708	CAD	CAD protein;Glutamine-dependent carbamoyl-phosphate synthase;Aspartate carbamoyltransferase;Dihydroorotase	27	15.5	2.57497	35	17.693	31	19.4	-3.4258	30	22.011
	P30153	PPP2R1A	Serine/threonine-protein phosphatase 2A 65 kDa regulatory subunit A alpha isoform	9	21.4	2.01913	9	16.534	11	25.1	-2.47995	11	20.576
	P07737	PFN1	Profilin-1	9	67.1	1.96872	9	23.73	2	15.7	-2.71151	3	15.137
	O95831	AIFM1	Apoptosis-inducing factor 1, mitochondrial	4	8	1.95832	4	7.502	3	8.6	-1.97869	3	18.182
	P05141	SLC25A5	ADP/ATP translocase 2;ADP/ATP translocase 2, N-terminally processed	4	12.1	1.80426	4	4.7121	6	17.4	-1.17221	6	11.732
	P07900	HSP90AA1	Heat shock protein HSP 90-alpha	12	19.9	1.58938	13	168.34	16	24.3	-3.02433	14	17.964
	O43242	PSMD3	26S proteasome non-ATPase regulatory subunit 3	15	31.6	1.51435	16	18.664	18	39.5	-1.85904	18	12.657
	P50402	EMD	Emerin	3	16.5	1.32723	3	15.501	4	22	-1.93976	3	41.095
	P62987;P62979;P0CG47;P0CG48	UBA52;RPS27A;UBB;UBC	Ubiquitin-60S ribosomal protein L40;Ubiquitin;60S ribosomal protein L40;Ubiquitin-40S ribosomal protein S27a;Ubiquitin;40S ribosomal protein S27a;Polyubiquitin-B;Ubiquitin;Polyubiquitin-C;Ubiquitin	4	26.6	1.2397	14	132.32	4	36.7	-1.66105	11	80.046
	P11021	HSPA5	78 kDa glucose-regulated protein	18	32.7	1.21002	18	186.44	23	41.9	-4.95639	17	28.83
	P28074	PSMB5	Proteasome subunit beta type-5	7	37.3	1.12512	7	19.168	7	28.1	-1.82501	7	29.69
	Q9UNM6	PSMD13	26S proteasome non-ATPase regulatory subunit 13	3	8	1.0916	4	6.3227	4	13	-1.09866	3	7.2541
	P51665	PSMD7	26S proteasome non-ATPase regulatory subunit 7	3	15.1	1.06647	3	155.59	3	11.1	-1.13511	3	12.378
	P25786	PSMA1	Proteasome subunit alpha type-1	5	19	1.0467	4	20.285	7	31.9	-1.82967	7	25.902
	P31948	STIP1	Stress-induced-phosphoprotein 1	4	9	1.00303	3	15.669	3	7.2	-2.12331	3	12.315
	P62333	PSMC6	26S protease regulatory subunit 10B	5	16.7	0.996461	4	13.192	8	27.2	-1.29715	8	13.782
